# Supplementary material for: Molecular basis for proofreading by the unique exonuclease domain of Family-D DNA polymerases
Source: Research Square preprint supplement (doi:10.21203/rs.3.rs-3248845/v1), 2023-09-15
Supplement: Supplementary file 1 [file 4983c7559623eee303d9a606.xlsx]

## Sheet: Fig. 4
PolD wild type					PolD Y412A					PolD F586A					PolD R499A					PolD Double (Y412A/F586A)					PolD R1178A					PolD Triple (Y412A/F586A/R499A)
	[Product] (nM)					[Product] (nM)					[Product] (nM)					[Product] (nM)					[Product] (nM)					[Product] (nM)					[Product] (nM)
Time (s)	Time course 1	Time course 2	Time course 3		Time (s)	Time course 1	Time course 2	Time course 3		Time (s)	Time course 1	Time course 2	Time course 3		Time (s)	Time course 1	Time course 2	Time course 3		Time (s)	Time course 1	Time course 2	Time course 3		Time (s)	Time course 1	Time course 2	Time course 3		Time (s)	Time course 1	Time course 2	Time course 3
0	0	0	0		0	0	0	0		0	0	0	0		0	0	0	0		0	0	0	0		0	0	0	0		0	0	0	0
1	12.928	8.408	7.744		15	34.128	36.952	35.88		15	32.6	33.728	33.168		15	8.896	13.8	24.296		15	5.136	10.552	5.08		1	6.71452	5.9735	12.4806		1	2.576	2.664	2.304
2.5	15.056	19.416	20.856		30	49.544	54.4	55.192		30	43.312	44.768	48.048		30	14.608	15.448	16.68		30	11.36	9.512	10.344		2.5	12.938	14.5951	12.5275		2.5	5.016	4.48	6.272
5	25.24	28.064	26.648		45	60.664	64.304	64.464		45	53.432	60.528	60.888		45	20.792	21.008	20.856		45	14.224	17.992	14.576		5	23.6009	23.4831	27.3777		5	8.816	8.432	7.672
10	40.536	41.208	39.76		60	67.664	70.272	70.576		60	61.608	63.544	61.568		60	26.832	24.336	23.536		60	19.312	18.624	18.416		10	44.1316	39.4892	45.0966		10	10.2	10.848	10.104
25	61.856	58.064	58.12		75	72.16	72.576	72.88		75	67.416	68.232	66.296		75	32.28	33.544	29.888		75	23.192	22.76	22.176		25	69.8071	65.4013	67.8085		25	13.424	13.168	12.608
40	73.976	74.072	73.128		90	75.216	75.224	75.864		90	71.104	70.36	72.704		90	35.256	33.696	35.872		90	27.424	26.336	26.496		40	77.3926	80	74.1408		40	14.936	15.944	15.256
100	80	70.672	79.504		105	76.168	77.008	77.552		105	73.744	74.144	74.888		105	40.184	37.568	38.88		105	30.168	30.272	30.496		100	80	80	80		100	17.432	17.928	17.768

## Sheet: Fig. 5
		Assay 1		Assay 2
Mutant No	Mutation	Repaired ratio	Bypassed ratio	Repaired ratio	Bypassed ratio
60	wt	0.6482	0.3518	0.6005	0.3995
85	R1178A	0.6086	0.3914	0.6111	0.3889
79	Y412A	0.3008	0.6992	0.288	0.712
137	F586A	0.1699	0.8301	0.1788	0.8212
91	R499A	0.1732	0.8268	0.1534	0.8466
81	Double	0.0686	0.9314	0	1
155	Triple	0	1	0	1
47	Exo-	0	1	0	1
